# Supplementary material for: Web-Based Treatment Program Using Intensive Therapeutic Contact for Patients With Eating Disorders: Before-After Study
Source: J Med Internet Res. 2013 Feb 4;15(2):e12. doi: 10.2196/jmir.2211 (PMC3636210; doi:10.2196/jmir.2211)
Supplement: Supplementary file 1 [file jmir_v15i2e12_app1.pdf]

Treatment outcomes for individual diagnostic groups.

| Variable                                     | Pretreatment |      | Post-treatment  |      |       | Follow-up at 6 months |      |       | Overall effect <sup>a</sup> |    |       |                          |
|----------------------------------------------|--------------|------|-----------------|------|-------|-----------------------|------|-------|-----------------------------|----|-------|--------------------------|
|                                              | Mean         | SD   | MD <sup>b</sup> | SD   | P     | MD <sup>b</sup>       | SD   | P     | F                           | df | P     | Effect size <sup>c</sup> |
| <b>EDNOS group<sup>d</sup></b>               |              |      |                 |      |       |                       |      |       |                             |    |       |                          |
| Eating disorder psychopathology <sup>e</sup> | 3.2          | 1.1  | 1.4             | 1.3  | <.001 | 1.3                   | 1.3  | <.001 | 40.5                        | 48 | <.001 | 1.26                     |
| Restraint                                    | 2.1          | 1.5  | 0.7             | 1.8  | <.001 | 0.8                   | 1.3  | <.001 | 7.1                         | 48 | .001  | 0.53                     |
| Eating concern                               | 2.8          | 1.3  | 1.6             | 1.5  | <.01  | 1.3                   | 1.5  | <.001 | 44.5                        | 51 | <.001 | 1.00                     |
| Shape concern                                | 4.2          | 1.3  | 1.7             | 1.6  | <.001 | 1.7                   | 1.7  | <.001 | 31.5                        | 49 | <.001 | 1.29                     |
| Weight concern                               | 3.9          | 1.2  | 1.5             | 1.5  | <.001 | 1.5                   | 1.6  | <.001 | 32.4                        | 48 | <.001 | 1.28                     |
| Body dissatisfaction <sup>f</sup>            | 61.0         | 15.8 | 17.2            | 12.2 | <.001 | 17.2                  | 17.0 | <.001 | 44.7                        | 48 | <.001 | 1.09                     |
| Quality of life <sup>g</sup>                 | 59.1         | 16.3 | -10.4           | 19.2 | <.001 | -7.3                  | 22.3 | .26   | 11.3                        | 50 | <.001 | 0.45                     |
| Mental health <sup>h</sup>                   | 36.6         | 20.0 | 15.6            | 15.5 | <.001 | 14.3                  | 16.1 | <.001 | 28.3                        | 50 | <.001 | 0.72                     |
| Physical health <sup>i</sup>                 | 2.0          | 0.5  | 0.4             | 0.3  | <.001 | 0.3                   | 0.3  | <.001 | 35.0                        | 48 | <.001 | 0.55                     |
| <b>BN NP group<sup>j</sup></b>               |              |      |                 |      |       |                       |      |       |                             |    |       |                          |
| Eating disorder psychopathology <sup>e</sup> | 3.8          | 0.9  | 1.0             | 1.2  | .10   | 1.1                   | 1.5  | .41   | 4.8                         | 7  | .04   | 1.22                     |
| Restraint                                    | 3.1          | 1.6  | 1.1             | 1.5  | .15   | 0.5                   | 2.0  | .98   | 3.3                         | 10 | .07   | 0.29                     |
| Eating concern                               | 3.3          | 1.0  | 1.0             | 1.4  | .19   | 0.9                   | 0.9  | .23   | 7.1                         | 8  | .01   | 0.92                     |
| Shape concern                                | 4.5          | 1.2  | 0.9             | 1.4  | .22   | 1.6                   | 1.7  | .13   | 3.7                         | 8  | .06   | 1.36                     |
| Weight concern                               | 4.3          | 1.1  | 0.9             | 1.3  | .20   | 1.2                   | 1.9  | .59   | 3.7                         | 8  | .06   | 1.02                     |
| Body dissatisfaction <sup>f</sup>            | 62.1         | 16.9 | 8.8             | 15.2 | .41   | 13.3                  | 16.3 | .28   | 5.9                         | 6  | .03   | 0.79                     |
| Quality of life <sup>g</sup>                 | 67.4         | 13.7 | -3.7            | 10.0 | .79   | -7.8                  | 13.2 | .27   | 2.8                         | 10 | .10   | 0.57                     |
| Mental health <sup>h</sup>                   | 36.3         | 16.0 | 3.8             | 19.8 | .99   | 11.2                  | 19.0 | .40   | 4.9                         | 10 | .03   | 0.70                     |
| Physical health <sup>i</sup>                 | 2.1          | 0.5  | 0.3             | 0.3  | .04   | 0.2                   | 0.3  | .56   | 4.9                         | 9  | .03   | 0.38                     |
| <b>BN P group<sup>k</sup></b>                |              |      |                 |      |       |                       |      |       |                             |    |       |                          |
| Eating disorder psychopathology <sup>e</sup> | 3.8          | 0.8  | 1.8             | 1.1  | <.001 | 0.1                   | 1.3  | 1.00  | 27.7                        | 11 | <.001 | 0.09                     |
| Restraint                                    | 3.5          | 1.3  | 2.0             | 1.2  | .001  | 1.0                   | 1.6  | .57   | 12.1                        | 8  | .002  | 0.80                     |
| Eating concern                               | 3.4          | 0.9  | 1.7             | 1.1  | .001  | 0.0                   | 1.6  | 1.00  | 10.4                        | 7  | .005  | 0.00                     |
| Shape concern                                | 4.3          | 1.2  | 1.8             | 1.4  | .01   | -0.3                  | 1.8  | 1.00  | 17.6                        | 9  | <.001 | 0.25                     |
| Weight concern                               | 4.0          | 1.4  | 1.5             | 1.1  | .01   | 0.1                   | 0.9  | 1.00  | 13.0                        | 9  | .002  | 0.00                     |
| Body dissatisfaction <sup>f</sup>            | 55.5         | 20.4 | 9.8             | 15.6 | .22   | -4.1                  | 10.2 | .90   | 3.1                         | 8  | .09   | 0.20                     |
| Quality of life <sup>g</sup>                 | 53.3         | 18.5 | -11.5           | 15.6 | .16   | -9.7                  | 26.7 | .92   | 7.8                         | 10 | .006  | 0.52                     |
| Mental health <sup>h</sup>                   | 47.8         | 19.7 | 12.6            | 16.8 | .18   | -4.4                  | 15.7 | .98   | 3.1                         | 10 | .08   | 0.23                     |
| Physical health <sup>i</sup>                 | 2.4          | 0.5  | 0.2             | 0.4  | .36   | 0.0                   | 0.5  | 1.00  | 2.0                         | 7  | .20   | 0.09                     |

<sup>a</sup>Treatment outcomes were measured with Repeated Measures and Mixed Model analysis.

<sup>b</sup>MD = Mean Difference; positive MD scores indicate a decrease in baseline scores and negative MD scores indicate an increase in baseline scores.

<sup>c</sup>Effect sizes were measured with Cohen's *d* using MD at 6-months follow-up and baseline SD.

<sup>d</sup>EDNOS = eating disorder not otherwise specified; pre-treatment *n* = 115; post-treatment *n* = 64; follow-up at 6 months *n* = 34.

<sup>e</sup>Eating Disorder Examination – Questionnaire (EDE-Q).

<sup>f</sup>Body Attitude Test (BAT).

<sup>g</sup>EuroQoL-5D visual analogue scale (EQ-5D VAS).

<sup>h</sup>21-item Depression Anxiety Stress Scale (DASS-21).

<sup>i</sup>Total score consisting of Maudsley Addiction Profile Health Symptom Scale (MAP-HSS) and 15 additional eating disorder-specific physical complaints.

<sup>j</sup>BN NP = bulimia nervosa non-purging; pre-treatment *n* = 24; post-treatment *n* = 11; follow-up at 6 months *n* = 9.

<sup>k</sup>BN P = bulimia nervosa purging; pre-treatment *n* = 24; post-treatment *n* = 10; follow-up at 6 months *n* = 6.
